# Supplementary material for: Referent seismic crustal model of the Dinarides
Source: Copernicus journal article supplement (doi:10.5194/egusphere-2023-183), 2023-02-15
Supplement: Supplementary file [file egusphere-2023-183-RC1-supplement.pdf]

- 1) kriging of crustal parameters: did you observe any anisotropy in the variograms estimated along the vertical direction and along the horizontal axis?
  - 2) how did you choose the width of the gaussian filter applied to the Moho interface?
  - 3) It could be interesting to analyze how your model is different from European scale models (e.g. EPCrust).
  - 4) Petrinja earthquake:
    - a) which hypocenter did you used? You did not report the reference in the text.
    - b) Fig 9 shows that the use of the 3D model removed the dependency of the residuals on the distance and greatly reduced the residual dispersion; on the other side the mean residual (for Pg and also Pn) is about -0.5s: why did you not re-localize the event with the new velocity model?
- 
- lines 255-266: not clear
  - line 330: “we specified a relatively large area between 10° and 20° east longitude” -> from the maps (fig 3, ...) it seems that the interpolated area reaches 20.5° E longitude
  - lines 798-799: Handy 2010 is in the References but not cited in the text
  - lines 813-815: Kennet et al 1995 is in the References but not cited
  - lines 816-818: Korbar 2009 is in the References but not cited
  - lines 886-888: Tari 1998 is in the References but not cited
