# Supplementary material for: Referent seismic crustal model of the Dinarides
Source: Copernicus journal article supplement (doi:10.5194/egusphere-2023-183), 2023-02-15
Supplement: Supplementary file [file egusphere-2023-183-RC2-supplement.pdf]

- lines 254 – 265: Please explain better, this part of text is unclear.
- lines 371 – 376: What velocities for Neogene deposits did you get with these relations? From-to??
- lines 409 and 410: Do you have the sides reversed (SE and NW)?
- Figure 4: Please edit the coordinate marks that overlap at the 20 and 30 km depth slices.
- line 571, 615: Brocher's
- lines 614, 615: Can you explain what relations you used? What is a similar age? The deposits mentioned range from the Lower Miocene to more recent times.
- line 618: you said earlier 6.2–6.3 km/s
- Figures 9 and 10: What hypocenter parameters did you use to calculate travel times? A hypocenter derived based on the mentioned 1D model or a new 3D model, or some other velocity model? It would be interesting to show the locations of the hypocenters in the studied area based on the commonly used 1D model and the new 3D model.

**General:**

- Match the references in the text to the list.
- I recommend a careful proofreading.
